# Supplementary material for: Influence of Multi-Gene Allele Combinations on Grain Size of Rice and Development of a Regression Equation Model to Predict Grain Parameters
Source: PubMed Central journal article supplement (PMC4627975; doi:10.1186/s12284-015-0066-1), 2015-10-30

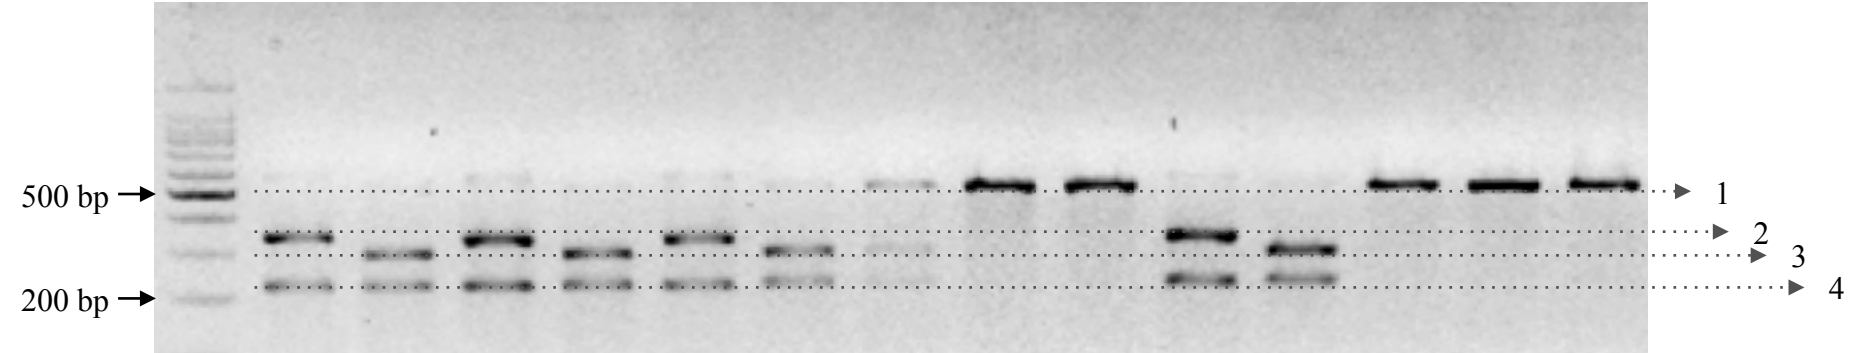

Supplement: 12284_2015_66_MOESM6_ESM.pdf [file 12284_2015_66_MOESM6_ESM.pdf]
